# Supplementary material for: Soft-template assisted synthesis of Fe/N-doped hollow carbon nanospheres as advanced electrocatalysts for the oxygen reduction reaction in microbial fuel cells
Source: Royal Society of Chemistry journal article supplement (doi:10.1039/c7ta05522f), 2017-01-01
Supplement: c7ta05522f1.pdf [file c7ta05522f1.pdf]

## Supporting Materials

### **Soft-template assisted synthesis of Fe/N-doped hollow carbon nanospheres as advanced electrocatalysts for oxygen reduction reaction in microbial fuel cells**

Lihua Zhou<sup>b</sup>, Chunli Yang<sup>b</sup>, Jing Wen<sup>a</sup>, Peng Fu<sup>b</sup>, Yaping Zhang<sup>a</sup>, Jian Sun<sup>a</sup>, Huaqian Wang<sup>b</sup>, and  
Yong Yuan<sup>\*a</sup>

<sup>a</sup>School of Environmental Science and Engineering, Institute of Environmental Health and Pollution Control, Guangdong University of Technology, Guangzhou 510006, PR China

<sup>b</sup>School of Chemical Engineering and Light Industry, Institute of Natural Medicine & Green Chemistry, Guangdong University of Technology, Guangzhou 510006, China

#### **Corresponding author:**

E-mail: [yuanyong@soil.gd.cn](mailto:yuanyong@soil.gd.cn); Tel: +86 20 87025872

**Table S1** Concentrations of the reagents for preparation of hollow or solid PACP nanosphere

| <b>Reagents</b>                      | <b>Hollow PACP<br/>(mM)</b> | <b>Hollow Fe-PACP<br/>(mM)</b> | <b>Solid Fe-PACP<br/>(mM)</b> |
|--------------------------------------|-----------------------------|--------------------------------|-------------------------------|
| Triton X-100                         | 1.6                         | 1.6                            | 1.6                           |
| Aniline                              | 50                          | 50                             | 50                            |
| Pyrrole                              | 50                          | 50                             | 85                            |
| APS                                  | 100                         | 100                            | 100                           |
| FeCl <sub>3</sub> ·6H <sub>2</sub> O | --                          | 50                             | 50                            |

**Table S2** Characterizations of the as-prepared materials

| <b>Samples</b> | <b>C%</b> | <b>N%</b> | <b>O%</b> | <b>Fe%</b> | <b>S<sub>BET</sub><sup>a</sup><br/>(m<sup>2</sup>/g)</b> | <b>S<sub>micro</sub><sup>b</sup><br/>(m<sup>2</sup>/g)</b> | <b>S<sub>meso</sub><sup>c</sup><br/>(m<sup>2</sup>/g)</b> | <b>Pore<br/>diameter<br/>r (nm)</b> | <b>V<sub>total</sub><sup>d</sup><br/>(cm<sup>3</sup>/g)</b> | <b>V<sub>micro</sub><sup>e</sup><br/>(cm<sup>3</sup>/g)</b> |
|----------------|-----------|-----------|-----------|------------|----------------------------------------------------------|------------------------------------------------------------|-----------------------------------------------------------|-------------------------------------|-------------------------------------------------------------|-------------------------------------------------------------|
| HCN            | 87.8      | 4.3       | 6.9       | -          | 893.3                                                    | 723.0                                                      | 170.3                                                     | 3.39                                | 0.76                                                        | 0.37                                                        |
| Fe-HCN         | 86.2      | 4.2       | 7.5       | 1.8        | 853.1                                                    | 675.1                                                      | 178.1                                                     | 4.73                                | 0.75                                                        | 0.34                                                        |
| Fe-SCN         | 85.8      | 4.0       | 7.6       | 1.5        | 322.8                                                    | 249.8                                                      | 73.0                                                      | 4.32                                | 0.35                                                        | 0.13                                                        |

S<sub>BET</sub> is the surface area calculated by the Brunauer–Emmett–Teller equation.

S<sub>micro</sub> is the microporous surface area calculated by the t-plot method.

S<sub>meso</sub> is the mesoporous surface area (S<sub>meso</sub>=S<sub>BET</sub>-S<sub>micro</sub>).

Total pore volume (V<sub>total</sub>) is calculated at a relative pressure of 0.99.

Micropore volume (V<sub>micro</sub>) is calculated by the t-plot method.

**Table S3** Summary of performance of hollow carbon nanosphere-based catalysts for ORR

| Catalysts                           | CV $E_{\text{peak}}$ (V) | LSV $E_{\text{on-set}}$ (V) | LSV $E_{\text{half-wave}}$ (V) | n   | Ref.      |
|-------------------------------------|--------------------------|-----------------------------|--------------------------------|-----|-----------|
| BHCSs-0.3-900                       | -0.17                    | -0.10                       | -0.15                          | 3.7 | [1]       |
| HMCN-G                              | -0.30                    | -0.15                       | -0.23                          | 3.7 | [2]       |
| S-PGHS-900                          | -0.26                    | -0.10                       | 0.17                           | 3.8 | [3]       |
| Fe/N/C HNSs-750                     | -0.17                    | -0.13                       | -0.15                          | 3.8 | [4]       |
| PDA-HCS-Co                          | -0.31                    | -0.18                       | -0.27                          | 3.8 | [5]       |
| HNCS71                              | \                        | -0.05                       | -0.20                          | 3.9 | [6]       |
| Co <sub>3</sub> O <sub>4</sub> /HCS | -0.28                    | -0.13                       | -0.22                          | 3.7 | [7]       |
| Fe/N-HCN                            | -0.09                    | 0.02                        | -0.12                          | 3.9 | This work |

The potentials were reported versus Ag/AgCl, which could be converted with the equations:

$$E_{\text{RHE}} = E_{\text{SCE}} + 0.2438 \text{ V} + 0.0591 \times \text{pH}$$

$$E_{\text{RHE}} = E_{\text{Ag/AgCl}} + 0.197 \text{ V} + 0.0591 \times \text{pH}$$

**Reference:**

- [1] H. Lu, Y. Li, L. Zhang, H. Li, Z. Zhou, A. Liu, Y. Zhang, S. Liu, RSC Adv, 5 (2015) 52126-52131.
- [2] Y. Qin, J. Li, J. Yuan, Y. Kong, Y. Tao, F. Lin, S. Li, J. Power Sources, 272 (2014) 696-702.
- [3] Xi'An Chen, X. H. Chen, X. Xu, Z. Yang, Z. Liu, L.J. Zhang, X.J. Xu, Y. Chen, S.M. Huang, Nanoscale, 22 (2014) 13740-13747.
- [4] Dan Zhou, L. P. Yang, L. H. Yu, J. H. Kong, X. Y. Yao, W. S. Liu, Z.C. Xu, X. H. Liu, Nanoscale, 7 (2015) 1501-1509.
- [5] H. Wang, X. Bo, A. Wang, L. Guo, Electrochem Commun, 36 (2013) 75-79.
- [6] J. Sanetuntikul, T. Hang, S. Shanmugam, Chem Commun, 50 (2014) 9473-9476.
- [7] Z. Chen, D. He, X. Xu, Z. Liu, M. Huang, X. Wang, H. Jiang, RSC Adv, 6 (2016) 34159-34164.

**Figure S1**

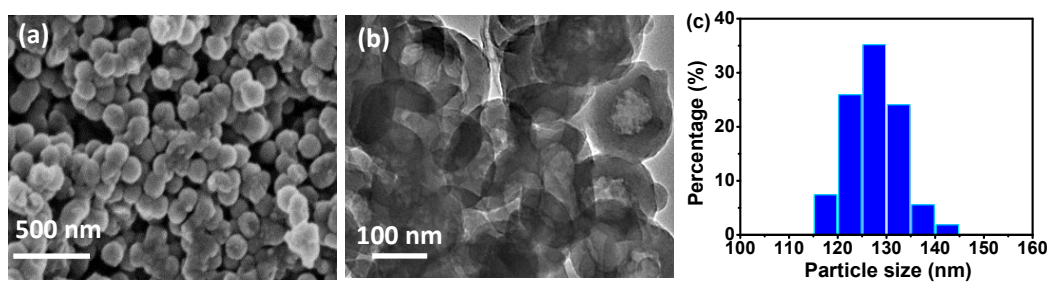

**Figure S1** (a) SEM image of Fe-doped PACP; (b) TEM image of Fe-doped PACP; (c) diameter distribution histograms of Fe-doped PACP from analysis of TEM image.

**Figure S2**

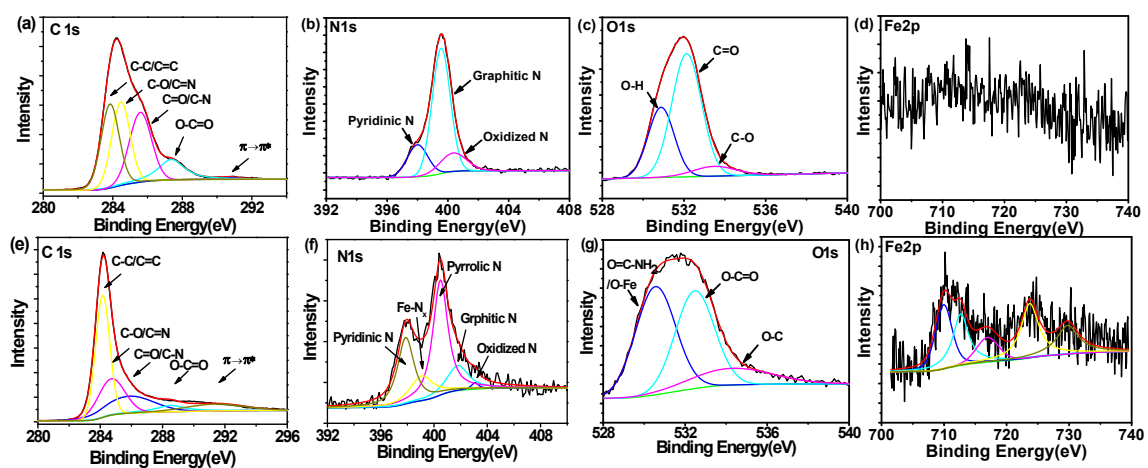

**Figure S2** High-resolution C1s, N1s and O1s XPS spectra of HCN (a~d), and Fe-SCN (e~h), respectively.

Figure S3

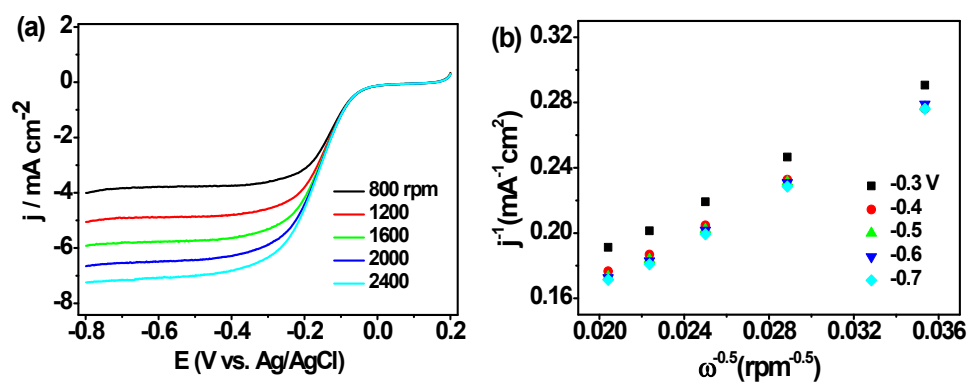

Figure S3 LSV curves of the Pt/C at different rotation rates in O<sub>2</sub>-saturated 0.1 M KOH solutions at a scan rate of 10 mV/s (a), and the corresponding K-L plots at different potentials for the Pt/C (b).

**Figure S4**

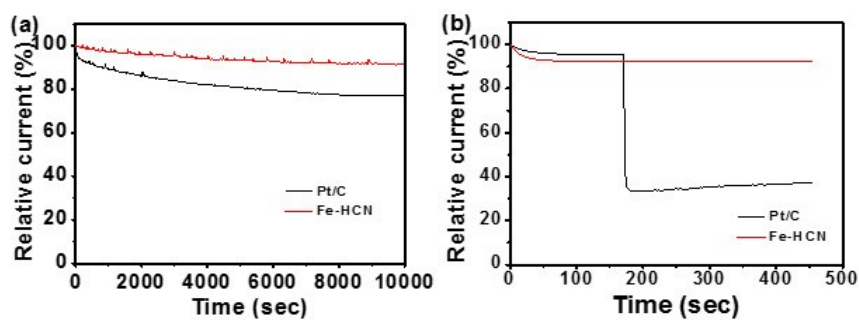

**Figure S4** (a) Stability test of the Fe/N-HCN and Pt/C electrodes at - 0.3 V (vs. Ag/AgCl) in O<sub>2</sub>-saturated 0.1 M KOH solutions at a rotation rate of 1600 rpm, normalized to the initial current responses; (b) Chronoamperometric responses to the injection of 3M methanol into an O<sub>2</sub>-saturated 0.1 M KOH solution at the Fe/N-HCN and Pt/C electrodes, normalized to the initial current responses.
